# Supplementary material for: Analysis of hair cortisol levels in captive chimpanzees: Effect of various methods on cortisol stability and variability
Source: PubMed Central journal article supplement (PMC4739149; doi:10.1016/j.mex.2016.01.004), 2016-01-16

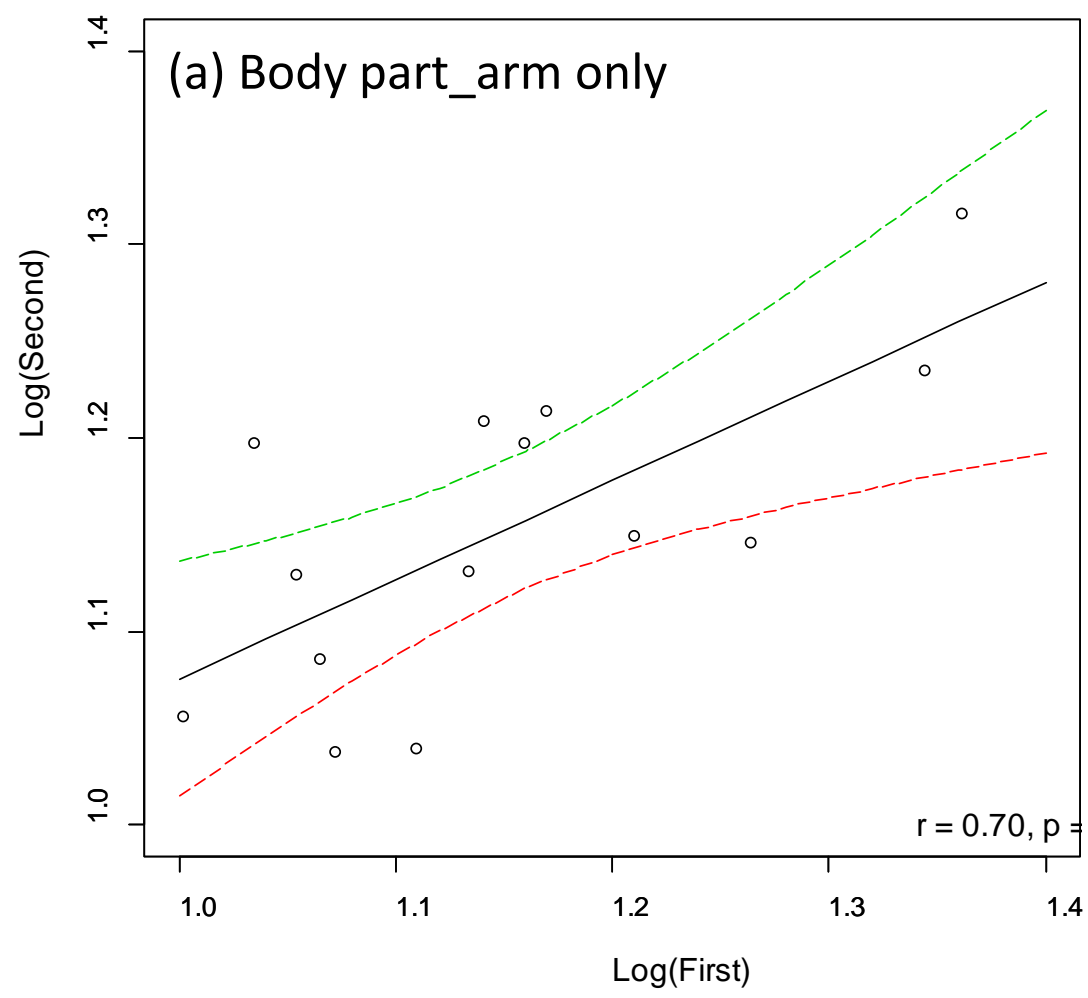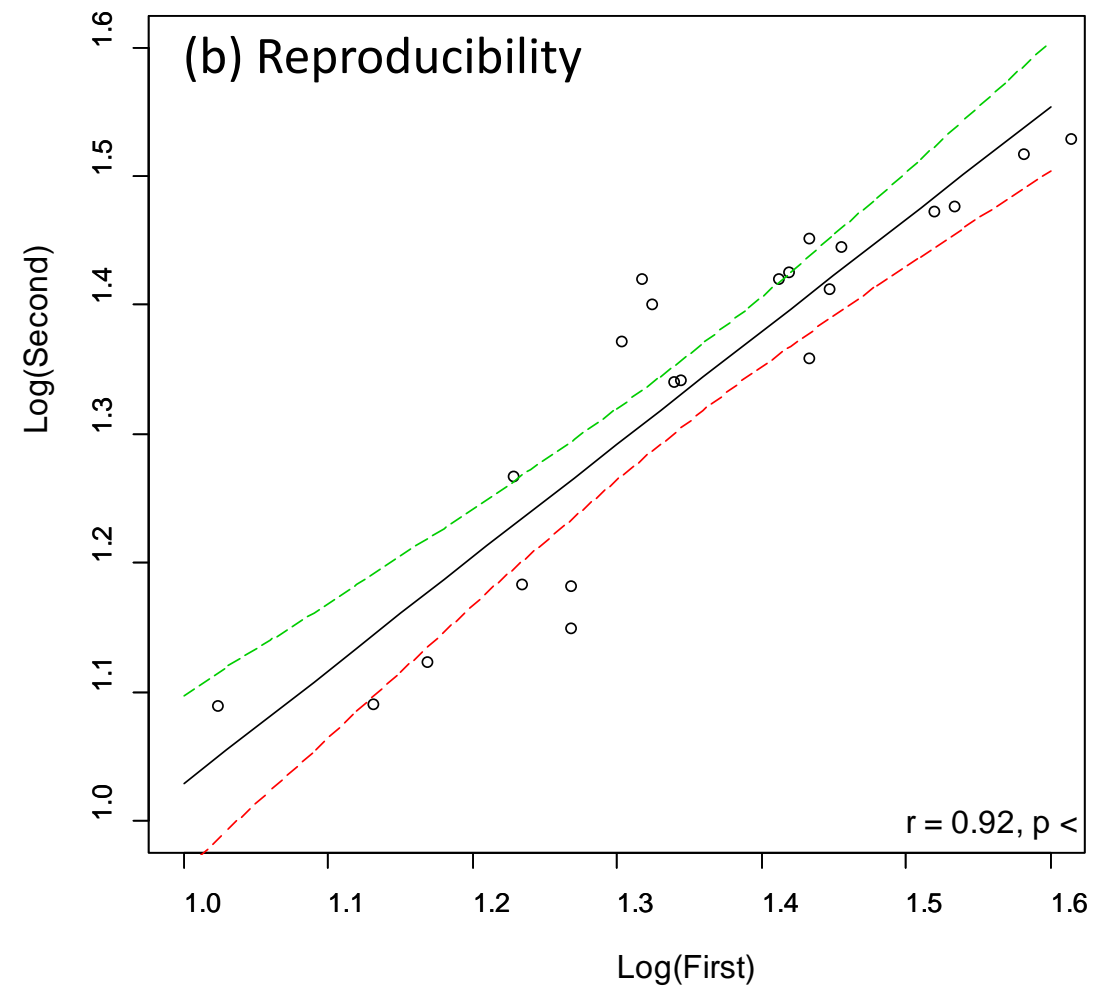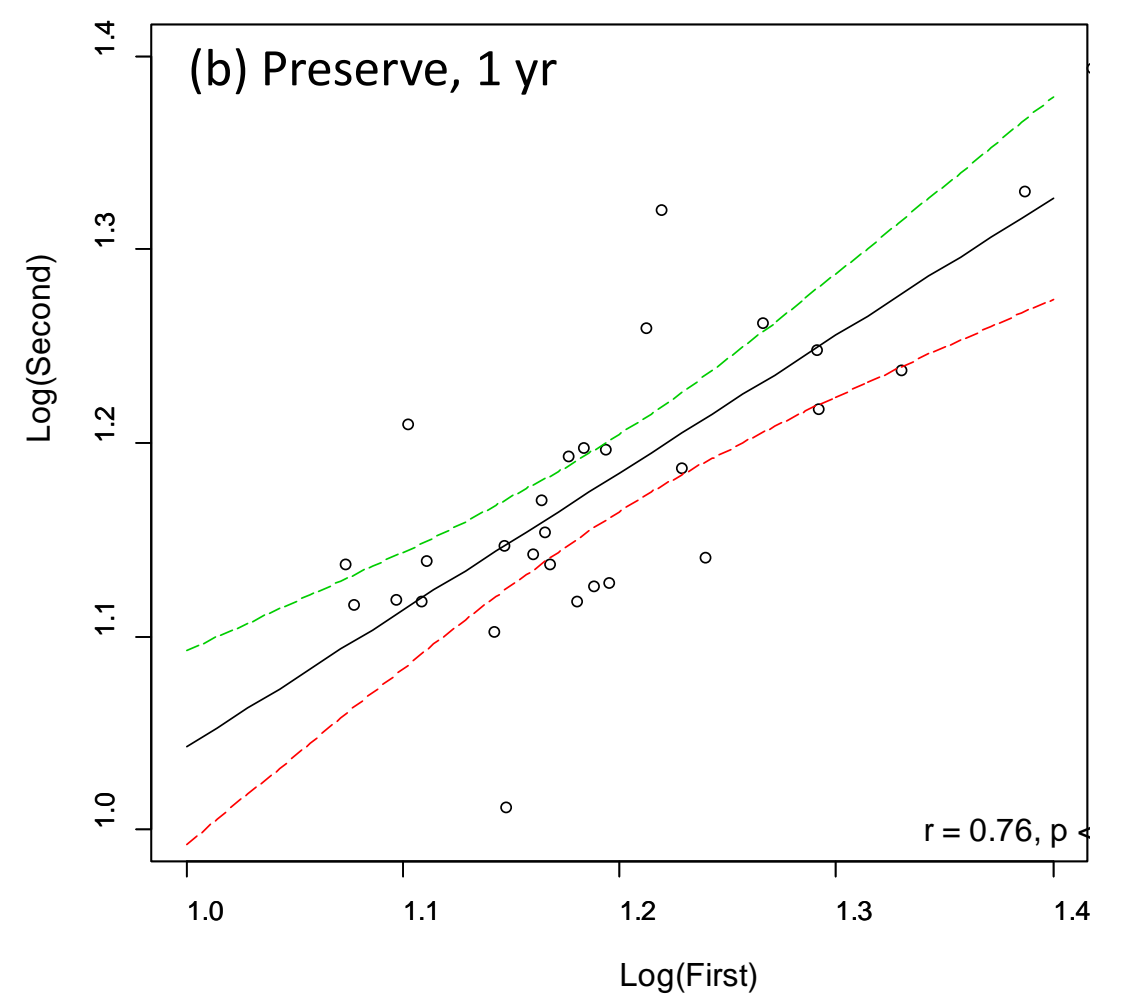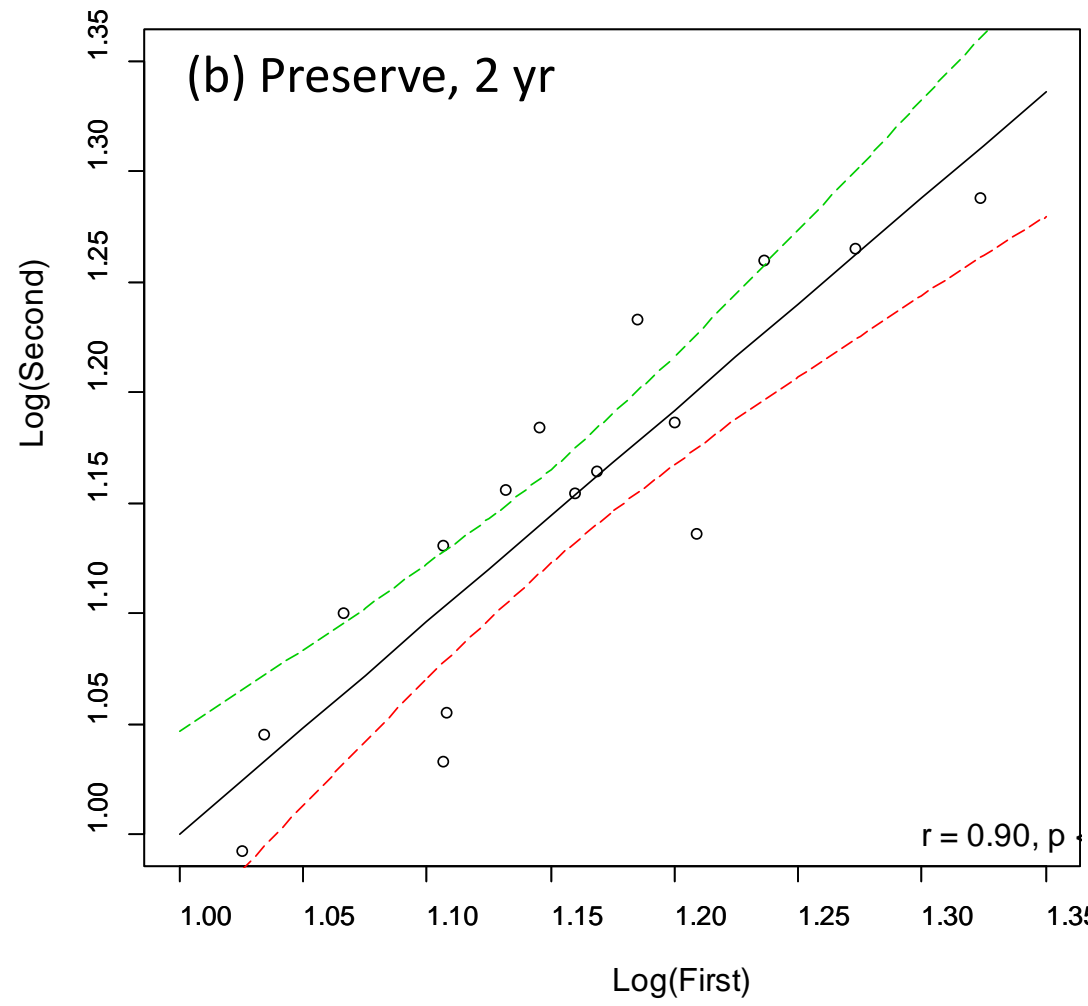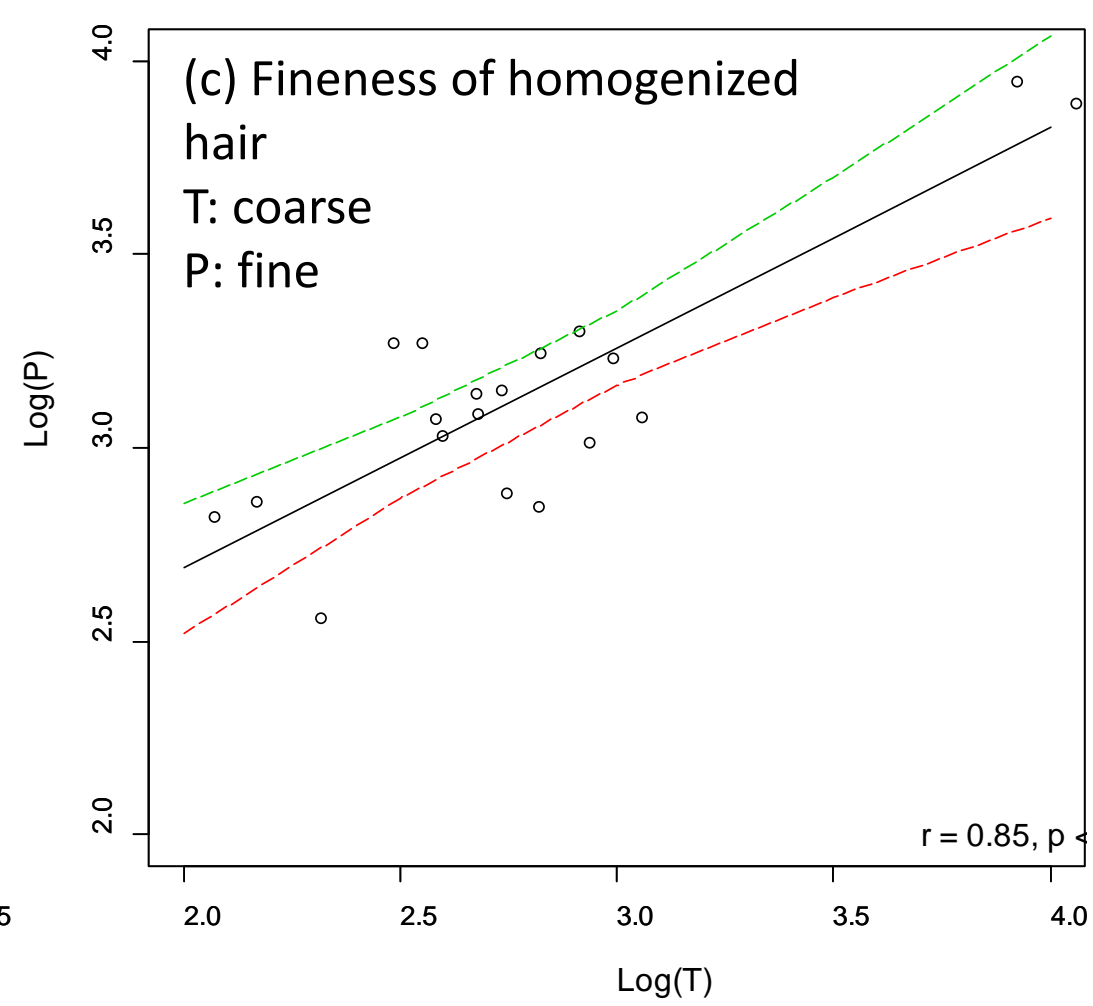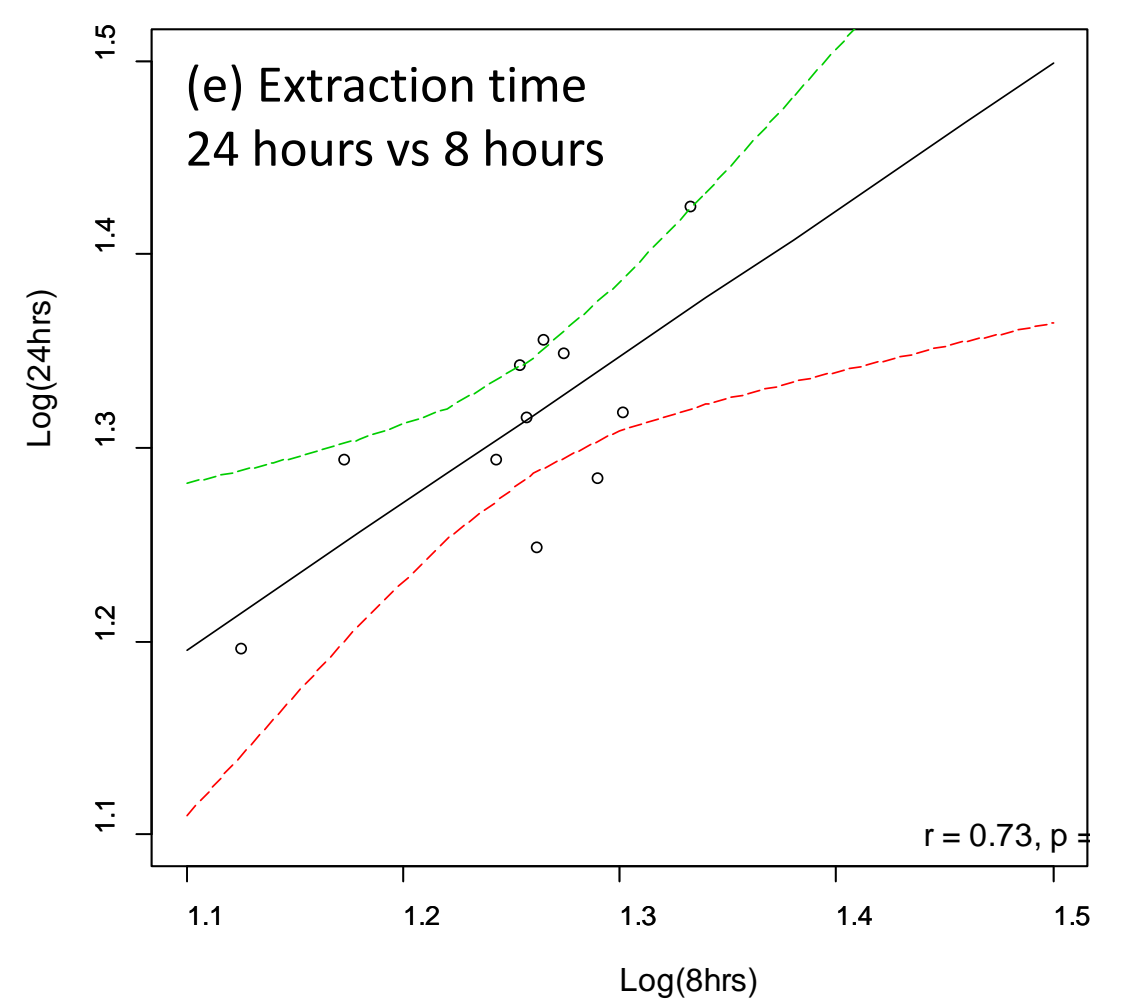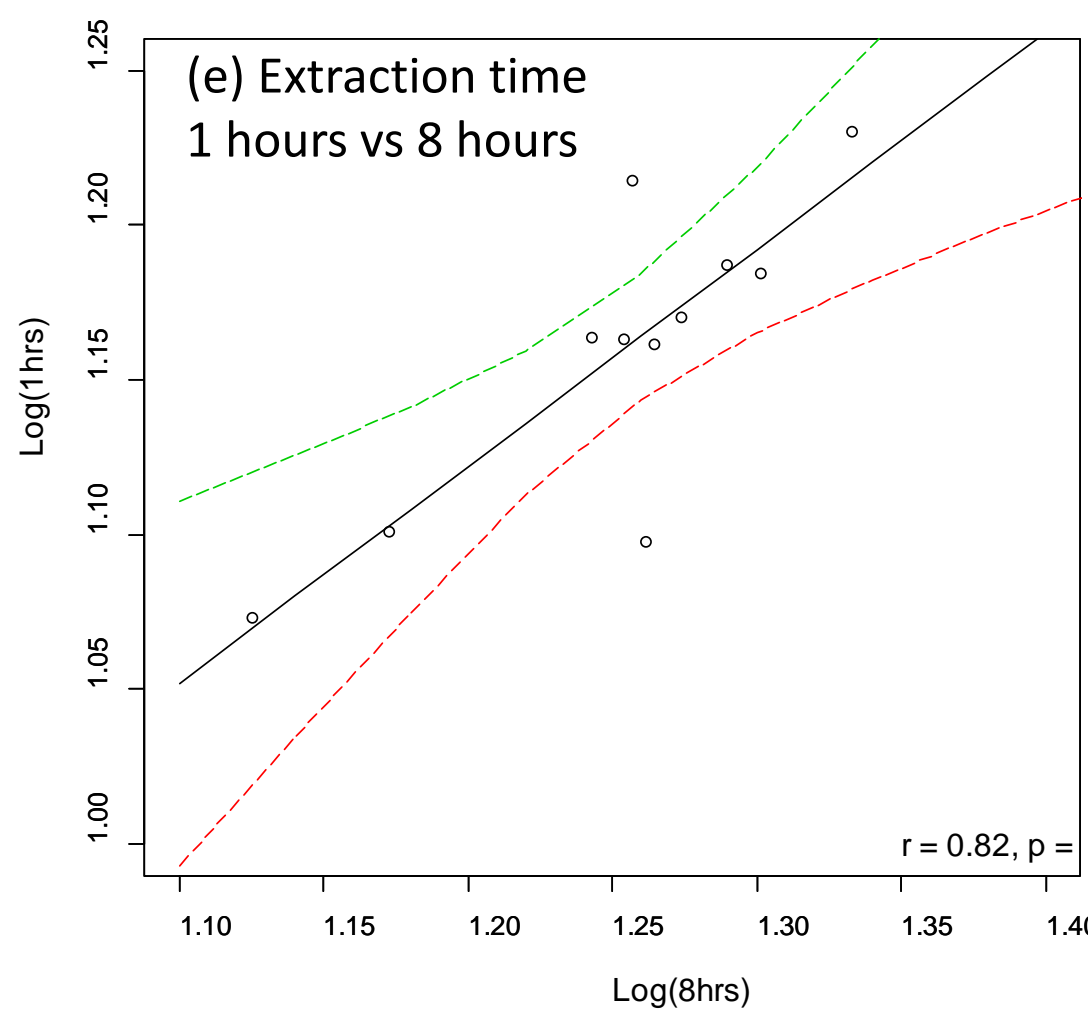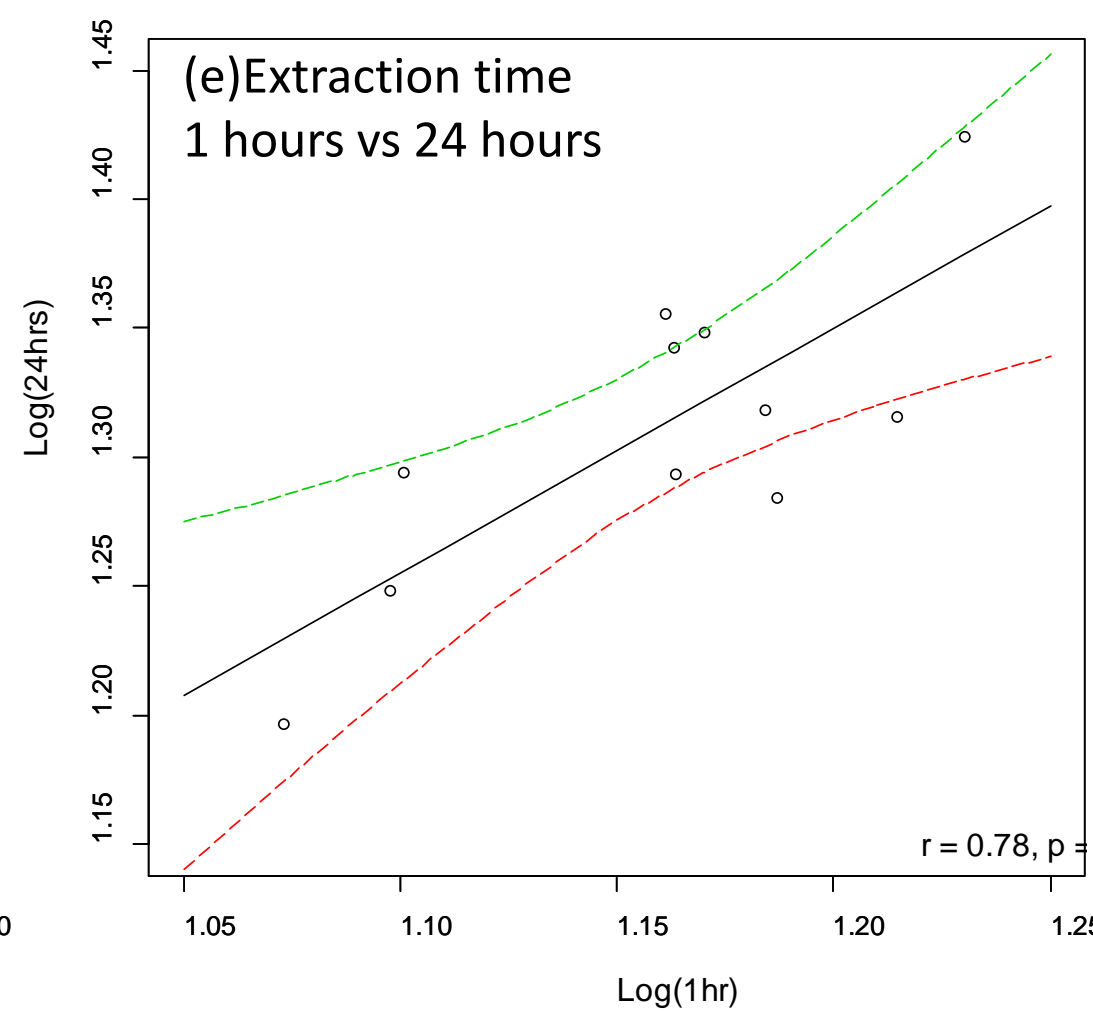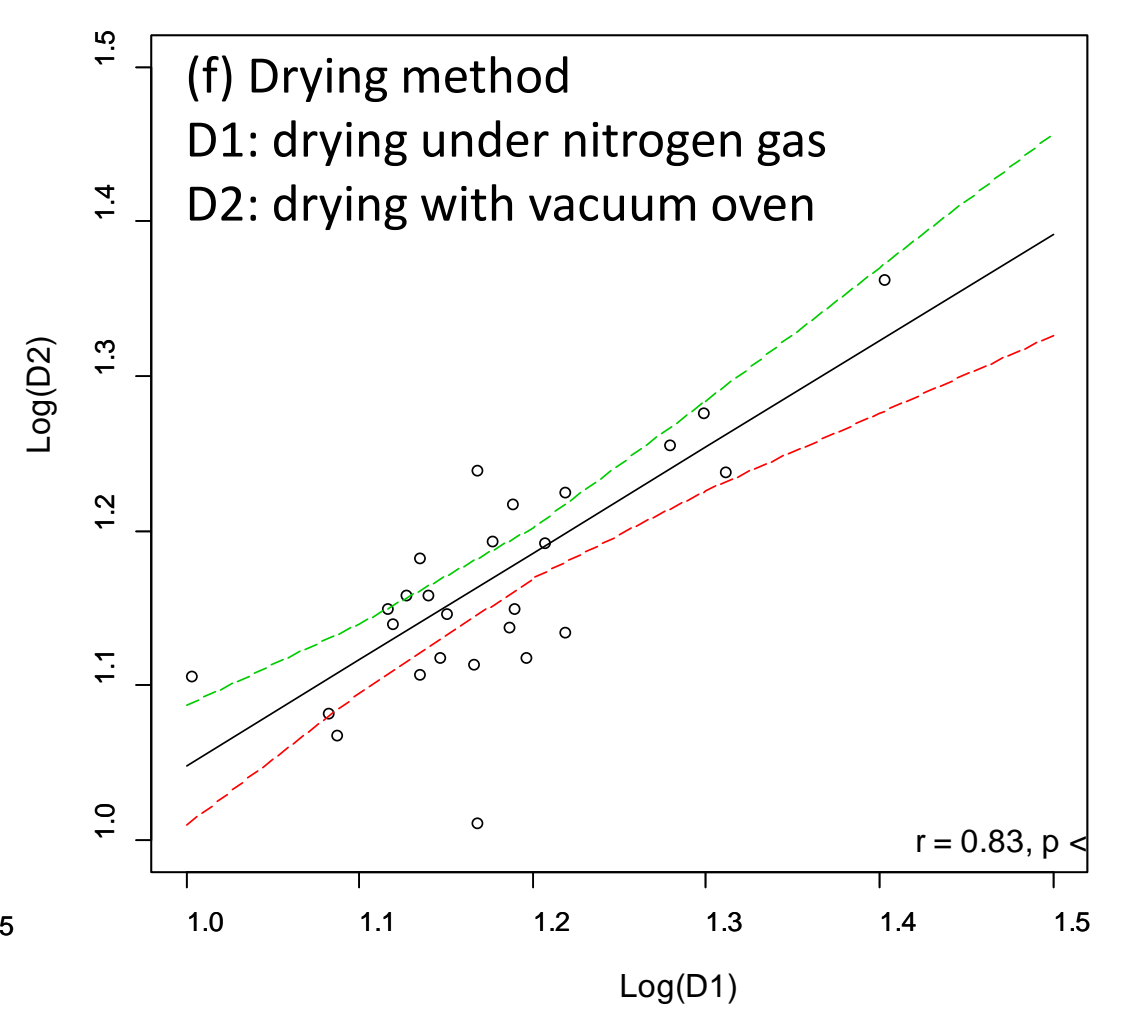

Supplement: mmc1.pdf [file mmc1.pdf]
